# Supplementary material for: Perioperative Outcomes in COVID-19 Obstetric Patients Undergoing Spinal Anesthesia for Cesarean Section: A Prospective Observational Study
Source: MDPI journal article supplement (doi:10.3390/healthcare10010023), 2021-12-24
Supplement: s1 [file s1]

**Table S1.** A comparison between COVID-19 positive and negative patients in perioperative vital signs.

| Characteristics         | COVID-19<br>negative<br>(n=31) | COVID-19<br>positive<br>(n=31) | p-value |
|-------------------------|--------------------------------|--------------------------------|---------|
| Heart rate              |                                |                                |         |
| Pre-induction           | 99.8                           | 105.5                          | 0.310   |
| Directly post-induction | 101.3                          | 103.5                          | 0.512   |
| 5 minutes               | 97.3                           | 104.4                          | 0.300   |
| 10 minutes              | 97.2                           | 102.3                          | 0.234   |
| 15 minutes              | 96.1                           | 102.0                          | 0.180   |
| 20 minutes              | 97.1                           | 99.5                           | 0.837   |
| 25 minutes              | 100.5                          | 100.0                          | 0.729   |
| 30 minutes              | 100.3                          | 102.7                          | 0.854   |
| 35 minutes              | 98.4                           | 104.7                          | 0.348   |
| 40 minutes              | 96.9                           | 103.7                          | 0.270   |
| 45 minutes              | 98.7                           | 102.3                          | 0.545   |
| 50 minutes              | 99.9                           | 100.3                          | 0.877   |
| 55 minutes              | 95.9                           | 96.5                           | 0.575   |
| 60 minutes              | 91.0                           | 94.7                           | 0.333   |
| 65 minutes              | 90.9                           | 94.1                           | 0.556   |
| 70 minutes              | 97.0                           | 95.6                           | 0.672   |
| At the PACU             | 89.4                           | 90.5                           | 0.476   |
| Syatolic blood pressure |                                |                                |         |
| Pre-induction           | 133.3                          | 135.7                          | 0.592   |
| Directly post-induction | 123.0                          | 118.2                          | 0.578   |
| 5 minutes               | 120.0                          | 123.1                          | 0.398   |
| 10 minutes              | 113.3                          | 117.0                          | 0.885   |
| 15 minutes              | 123.3                          | 117.7                          | 0.242   |
| 20 minutes              | 126.9                          | 117.4                          | 0.172   |
| 25 minutes              | 120.9                          | 122.6                          | 0.350   |
| 30 minutes              | 120.9                          | 120.5                          | 0.945   |
| 35 minutes              | 112.4                          | 120.6                          | 0.290   |
| 40 minutes              | 119.9                          | 121.8                          | 0.514   |
| 45 minutes              | 122.8                          | 119.6                          | 0.610   |
| 50 minutes              | 115.1                          | 124.0                          | 0.749   |
| 55 minutes              | 117.1                          | 120.4                          | 0.507   |

|             |       |       |       |
|-------------|-------|-------|-------|
| 60 minutes  | 116.9 | 120.9 | 0.548 |
| 65 minutes  | 119.1 | 119.5 | 0.920 |
| 70 minutes  | 117.3 | 122.1 | 0.352 |
| At the PACU | 120.4 | 122.0 | 0.464 |

#### Diastolic blood pressure

|                         |      |      |       |
|-------------------------|------|------|-------|
| Pre-induction           | 73.5 | 79.5 | 0.078 |
| Directly post-induction | 67.5 | 69.7 | 0.414 |
| 5 minutes               | 64.0 | 67.2 | 0.352 |
| 10 minutes              | 62.7 | 64.0 | 0.544 |
| 15 minutes              | 65.0 | 63.9 | 0.925 |
| 20 minutes              | 66.3 | 66.2 | 0.926 |
| 25 minutes              | 64.7 | 67.2 | 0.541 |
| 30 minutes              | 66.6 | 66.9 | 0.853 |
| 35 minutes              | 63.0 | 66.7 | 0.307 |
| 40 minutes              | 63.4 | 66.9 | 0.380 |
| 45 minutes              | 66.4 | 65.6 | 0.785 |
| 50 minutes              | 60.1 | 68.2 | 0.027 |
| 55 minutes              | 60.8 | 67.8 | 0.045 |
| 60 minutes              | 61.4 | 69.2 | 0.092 |
| 65 minutes              | 64.0 | 68.8 | 0.190 |
| 70 minutes              | 67.3 | 70.8 | 0.310 |
| At the PACU             | 69.8 | 71.5 | 0.526 |

#### Mean blood pressure

|                         |      |      |       |
|-------------------------|------|------|-------|
| Pre-induction           | 91.9 | 93.4 | 0.382 |
| Directly post-induction | 84.9 | 84.2 | 0.877 |
| 5 minutes               | 80.2 | 85.5 | 0.145 |
| 10 minutes              | 81.5 | 79.6 | 0.675 |
| 15 minutes              | 83.8 | 79.6 | 0.278 |
| 20 minutes              | 84.2 | 78.2 | 0.151 |
| 25 minutes              | 84.3 | 83.2 | 0.636 |
| 30 minutes              | 84.4 | 82.7 | 0.620 |
| 35 minutes              | 80.7 | 80.9 | 0.953 |
| 40 minutes              | 82.5 | 80.8 | 0.553 |
| 45 minutes              | 83.1 | 77.9 | 0.090 |
| 50 minutes              | 76.7 | 81.4 | 0.406 |
| 55 minutes              | 76.8 | 80.9 | 0.273 |
| 60 minutes              | 78.8 | 81.2 | 0.682 |
| 65 minutes              | 82.3 | 81.8 | 0.867 |
| 70 minutes              | 82.5 | 81.9 | 0.849 |

---

|                                |             |             |              |
|--------------------------------|-------------|-------------|--------------|
| <b>At the PACU</b>             | <b>82.7</b> | <b>84.5</b> | <b>0.637</b> |
| <b>Oxygen saturation</b>       |             |             |              |
| <b>Pre-induction</b>           | 98.2        | 97.5        | 0.534        |
| <b>Directly post-induction</b> | 98.4        | 98.0        | 0.159        |
| <b>5 minutes</b>               | 98.6        | 97.9        | 0.036        |
| <b>10 minutes</b>              | 98.8        | 98.1        | 0.048        |
| <b>15 minutes</b>              | 98.7        | 98.3        | 0.030        |
| <b>20 minutes</b>              | 99.0        | 97.9        | 0.009        |
| <b>25 minutes</b>              | 99.1        | 97.9        | 0.005        |
| <b>30 minutes</b>              | 99.1        | 98.3        | 0.006        |
| <b>35 minutes</b>              | 99.1        | 98.4        | 0.016        |
| <b>40 minutes</b>              | 99.0        | 98.1        | 0.013        |
| <b>45 minutes</b>              | 99.1        | 98.4        | 0.021        |
| <b>50 minutes</b>              | 99.3        | 98.1        | 0.001        |
| <b>55 minutes</b>              | 99.3        | 98.1        | 0.001        |
| <b>60 minutes</b>              | 98.7        | 98.3        | 0.162        |
| <b>65 minutes</b>              | 99.1        | 98.0        | 0.007        |
| <b>70 minutes</b>              | 98.6        | 98.4        | 0.287        |
| <b>At the PACU</b>             | 98.5        | 98.1        | 0.174        |

---
